# Supplementary material for: Bone histology of the Late Pleistocene Prolagus sardus (Lagomorpha: Mammalia) provides further insights into life-history strategy of insular giant small mammals
Source: Oxford University Press journal article supplement (doi:10.1093/zoolinnean/zlad112), 2023-09-23
Supplement: zlad112_suppl_supplementary_material.pdf [file zlad112_suppl_supplementary_material.pdf]

## SUPPORTING INFORMATION

Bone histology of the Late Pleistocene *Prolagus sardus* (Lagomorpha: Mammalia) provides further insights into life history of insular giant small mammals

doi: 10.1093/zoolinnean/zlad112

by Eva Fernández-Bejarano, Alejandro Blanco, Chiara Angelone, Zhaoqun Zhang, Blanca Moncunill-Solé\*

\*blanca.moncunill@gmail.com

### INDEX

|                  |         |
|------------------|---------|
| Appendix S1..... | page 2  |
| Table S1.....    | page 26 |
| Table S2.....    | page 28 |

### CAPTIONS

**Appendix S1.** Descriptive and inferential statistical results of the *P. sardus* and *Ochotona* species assessed in the study.

**Table S1.** Material of *Prolagus sardus* (N=15), *Ochotona collaris* (N=5), *Ochotona dauurica* (N=5) and *Ochotona princeps* (N=3) used in the present study. For each individual, it is included the growth plate status, as well as measurements (in mm) of the femur. Specimens whose bone tissue have been damaged by microorganisms are underlined. Abbreviations: Laterality (L=left, R=right), Growth plate status (B=broken, F=fused, NF=not fused, SL=fused with suture lines), Age category (A=adult, J=juvenile, Y=young adult) and Measurements [BM=body mass (in g), DAPm=anteroposterior diameter at the midshaft, DTm=transversal diameter at the midshaft, FAPDd=distal anteroposterior diameter of the femur, FLmax=maximum length of the femur (including or not the epiphyses), FTDD=distal transversal diameter of the femur, FTDP=proximal transversal diameter of the femur]. In the case of fossil species, the BM is the mean of the weights estimated using FAPDd, FTDD, FTDP (see the text); whereas in extant species, BM data come from the specimens' tags and museum records.

**Table S2.** Raw data of the cortex geometry (CA, MA, TA, CA/MA and CA/TA) and specimen's size (DAPm, DTm and BM) of *P. sardus*, *Oc. dauurica*, *Oc. collaris* and *Oc. princeps*. Abbreviations: Geometry data [CA=cortical area (in mm<sup>2</sup>); MA=medullary area (in mm<sup>2</sup>); and TA=total area (in mm<sup>2</sup>)] and Size data [DAPm=anteroposterior diameter at the midshaft (in mm), DTm=transversal diameter at the midshaft (in mm); and BM=body mass (in g)].

**APPENDIX S1. STATISTICAL RESULTS**

**1) DESCRIPTIVE ANALYSIS**

- *P. sardus* considering ontogenetic categories.

Continuous variables (logCA, logMA, logTA, logCA/MA, logCA/TA, log DAPm, logDTm) and grouping variable (age category: Juvenile, Young adult and Adult).

|                      | AgeCategory | logCA  | logMA  | logTA  | logCA/MA | logCA/TA | logDAPm | logDTm  |
|----------------------|-------------|--------|--------|--------|----------|----------|---------|---------|
| N                    | Juvenile    | 9      | 9      | 9      | 9        | 9        | 9       | 9       |
|                      | Young adult | 4      | 4      | 4      | 4        | 4        | 4       | 4       |
|                      | Adult       | 2      | 2      | 2      | 2        | 2        | 2       | 2       |
| Lost                 | Juvenile    | 0      | 0      | 0      | 0        | 0        | 0       | 0       |
|                      | Young adult | 0      | 0      | 0      | 0        | 0        | 0       | 0       |
|                      | Adult       | 0      | 0      | 0      | 0        | 0        | 0       | 0       |
| Mean                 | Juvenile    | 0.746  | 0.676  | 1.02   | 0.0699   | -0.271   | 0.531   | 0.627   |
|                      | Young adult | 0.836  | 0.813  | 1.13   | 0.0234   | -0.291   | 0.586   | 0.679   |
|                      | Adult       | 0.917  | 0.798  | 1.16   | 0.119    | -0.246   | 0.607   | 0.716   |
| Median               | Juvenile    | 0.790  | 0.665  | 1.04   | 0.102    | -0.253   | 0.531   | 0.638   |
|                      | Young adult | 0.824  | 0.833  | 1.15   | 0.0209   | -0.291   | 0.597   | 0.679   |
|                      | Adult       | 0.917  | 0.798  | 1.16   | 0.119    | -0.246   | 0.607   | 0.716   |
| Standard deviation   | Juvenile    | 0.140  | 0.0804 | 0.0989 | 0.121    | 0.0575   | 0.0589  | 0.0589  |
|                      | Young adult | 0.0594 | 0.0756 | 0.0562 | 0.0772   | 0.0375   | 0.0332  | 0.0212  |
|                      | Adult       | 0.0425 | 0.0225 | 0.0144 | 0.0650   | 0.0281   | 0.0226  | 0.00566 |
| Min                  | Juvenile    | 0.530  | 0.519  | 0.846  | -0.135   | -0.374   | 0.447   | 0.512   |
|                      | Young adult | 0.777  | 0.707  | 1.04   | -0.0543  | -0.329   | 0.538   | 0.658   |
|                      | Adult       | 0.887  | 0.782  | 1.15   | 0.0730   | -0.266   | 0.591   | 0.712   |
| Maz                  | Juvenile    | 0.925  | 0.782  | 1.13   | 0.216    | -0.206   | 0.613   | 0.695   |
|                      | Young adult | 0.919  | 0.877  | 1.17   | 0.106    | -0.251   | 0.613   | 0.699   |
|                      | Adult       | 0.947  | 0.814  | 1.17   | 0.165    | -0.226   | 0.623   | 0.720   |
| W Shapiro-Wilk       | Juvenile    | 0.936  | 0.929  | 0.936  | 0.938    | 0.926    | 0.938   | 0.930   |
|                      | Young adult | 0.901  | 0.899  | 0.818  | 0.901    | 0.900    | 0.860   | 0.830   |
|                      | Adult       | NaN    | NaN    | NaN    | NaN      | NaN      | NaN     | NaN     |
| P-value Shapiro-Wilk | Juvenile    | 0.538  | 0.469  | 0.538  | 0.563    | 0.445    | 0.563   | 0.478   |
|                      | Young adult | 0.438  | 0.427  | 0.138  | 0.437    | 0.434    | 0.259   | 0.167   |
|                      | Adult       | NaN *  | NaN *  | NaN *  | NaN *    | NaN *    | NaN *   | NaN *   |

Levene's test (considering ontogenetic categories of *P. sardus*)

|          | F     | gl1 | gl2 | p     |
|----------|-------|-----|-----|-------|
| logCA    | 3.124 | 2   | 12  | 0.081 |
| logMA    | 0.550 | 2   | 12  | 0.591 |
| logTA    | 2.192 | 2   | 12  | 0.154 |
| logCA/MA | 1.240 | 2   | 12  | 0.324 |
| logCA/TA | 1.218 | 2   | 12  | 0.330 |
| logDAPm  | 2.724 | 2   | 12  | 0.106 |
| logDTm   | 2.572 | 2   | 12  | 0.118 |

## Graphics

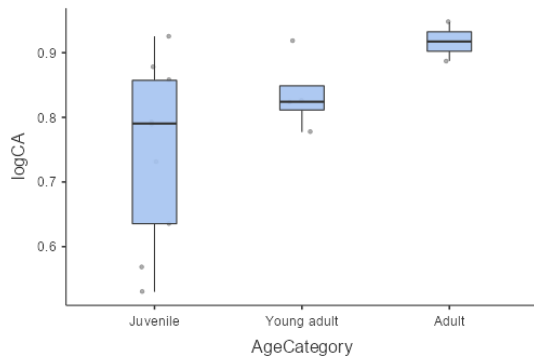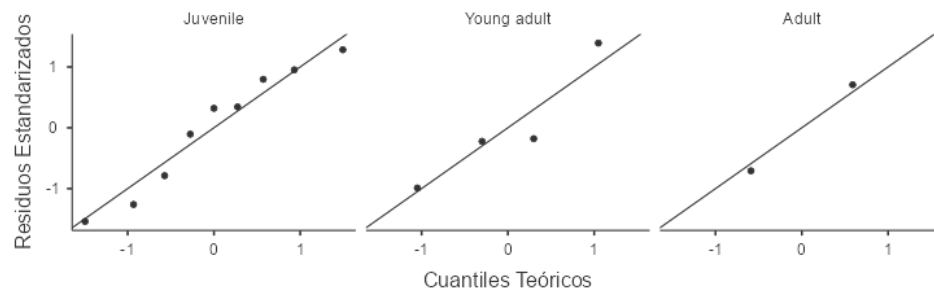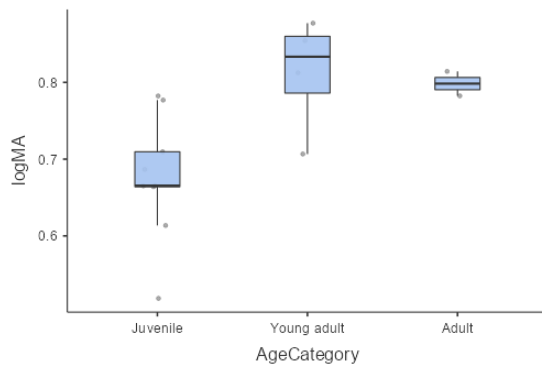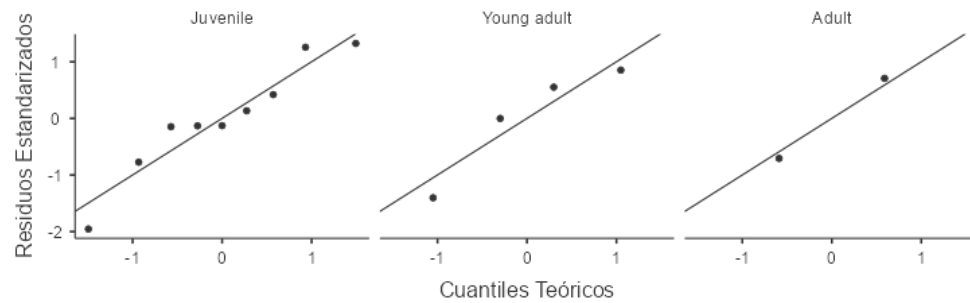

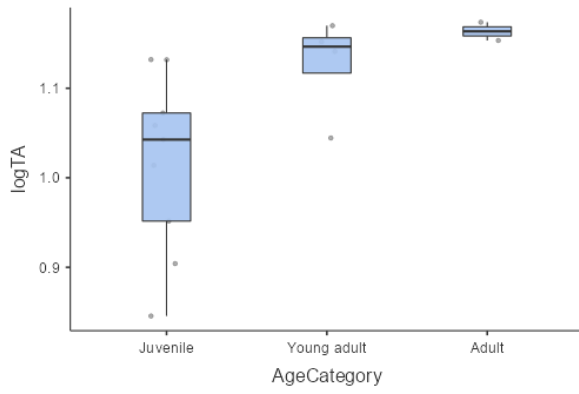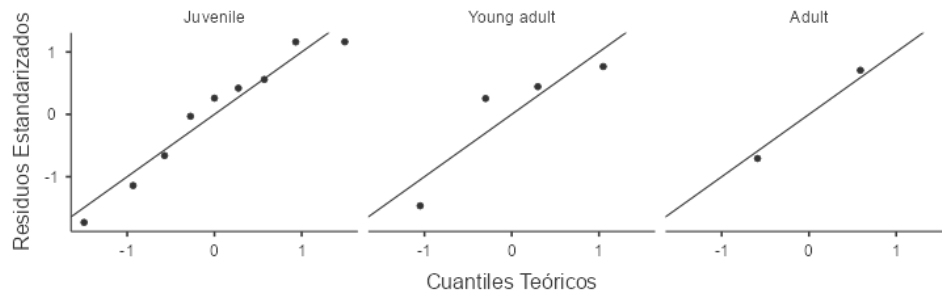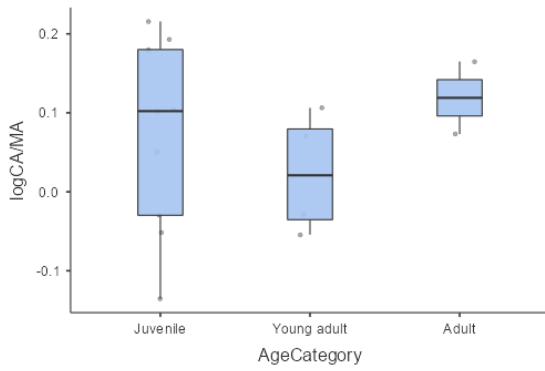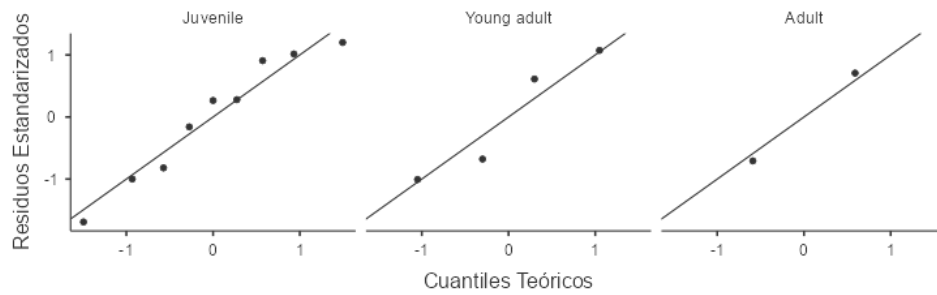

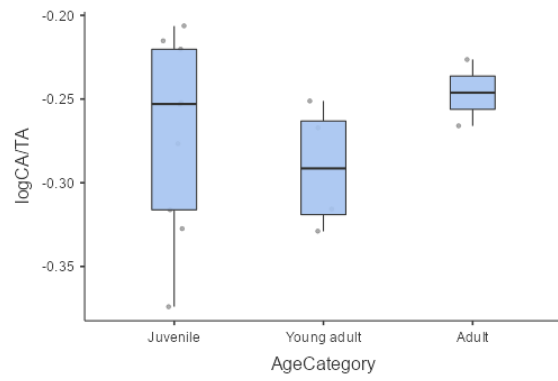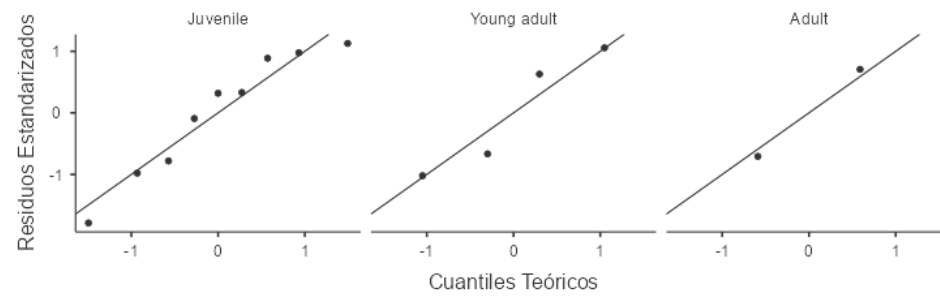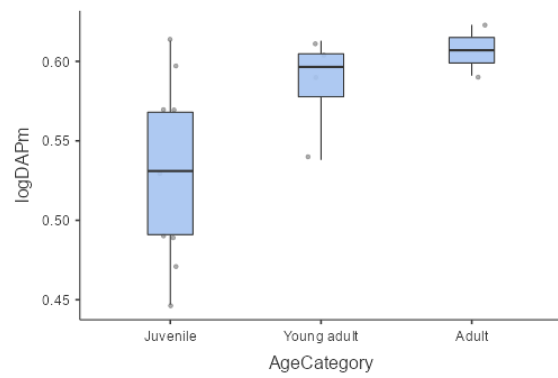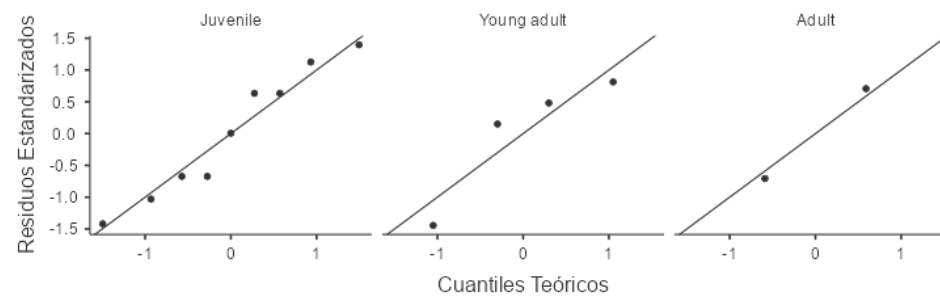

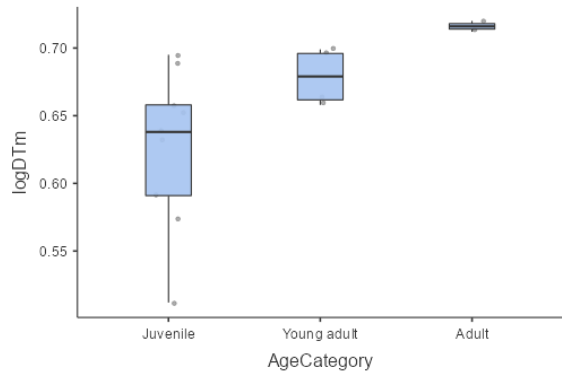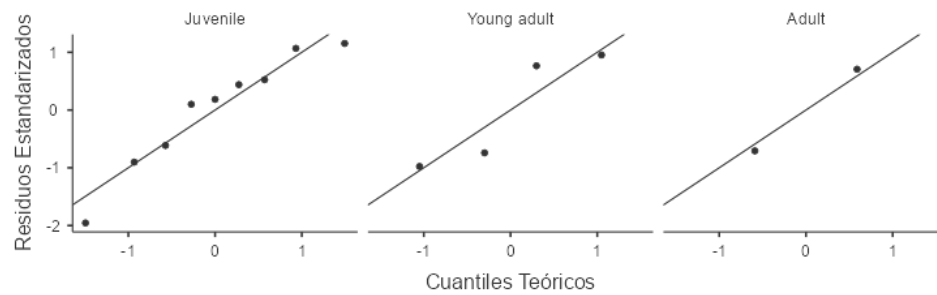

- Ochotona considering species (only adults).

Continuous variables (logCA, logMA, logTA, logCA/MA, logCA/TA, log DAPm, logDTm) and grouping variable (species: *Oc. princeps*, *Oc. collaris*, and *Oc. dauurica*).

|                    | Species             | logCA  | logMA  | logTA  | logCA/MA | logCA/TA | logDAPm | logDTm |
|--------------------|---------------------|--------|--------|--------|----------|----------|---------|--------|
| N                  | <i>Oc. princeps</i> | 3      | 3      | 3      | 3        | 3        | 3       | 3      |
|                    | <i>Oc. collaris</i> | 4      | 4      | 4      | 4        | 4        | 4       | 4      |
|                    | <i>Oc. dauurica</i> | 1      | 1      | 1      | 1        | 1        | 1       | 1      |
| Lost               | <i>Oc. princeps</i> | 0      | 0      | 0      | 0        | 0        | 0       | 0      |
|                    | <i>Oc. collaris</i> | 0      | 0      | 0      | 0        | 0        | 0       | 0      |
|                    | <i>Oc. dauurica</i> | 0      | 0      | 0      | 0        | 0        | 0       | 0      |
| Mean               | <i>Oc. princeps</i> | 0.315  | 0.272  | 0.597  | 0.0433   | -0.282   | 0.311   | 0.407  |
|                    | <i>Oc. collaris</i> | 0.272  | 0.213  | 0.545  | 0.0592   | -0.273   | 0.312   | 0.378  |
|                    | <i>Oc. dauurica</i> | 0.295  | 0.328  | 0.613  | -0.0331  | -0.318   | 0.297   | 0.428  |
| Median             | <i>Oc. princeps</i> | 0.317  | 0.286  | 0.603  | 0.0314   | -0.286   | 0.310   | 0.398  |
|                    | <i>Oc. collaris</i> | 0.277  | 0.211  | 0.546  | 0.0918   | -0.258   | 0.312   | 0.371  |
|                    | <i>Oc. dauurica</i> | 0.295  | 0.328  | 0.613  | -0.0331  | -0.318   | 0.297   | 0.428  |
| Standard deviation | <i>Oc. princeps</i> | 0.0699 | 0.0245 | 0.0273 | 0.0919   | 0.0432   | 0.0125  | 0.0232 |
|                    | <i>Oc. collaris</i> | 0.0399 | 0.0387 | 0.0216 | 0.0657   | 0.0319   | 0.00403 | 0.0159 |
|                    | <i>Oc. dauurica</i> | NaN    | NaN    | NaN    | NaN      | NaN      | NaN     | NaN    |
| Min                | <i>Oc. princeps</i> | 0.245  | 0.244  | 0.567  | -0.0422  | -0.323   | 0.299   | 0.389  |
|                    | <i>Oc. collaris</i> | 0.221  | 0.169  | 0.518  | -0.0394  | -0.321   | 0.307   | 0.367  |
|                    | <i>Oc. dauurica</i> | 0.295  | 0.328  | 0.613  | -0.0331  | -0.318   | 0.297   | 0.428  |
| Max                | <i>Oc. princeps</i> | 0.384  | 0.287  | 0.621  | 0.141    | -0.236   | 0.324   | 0.433  |
|                    | <i>Oc. collaris</i> | 0.313  | 0.261  | 0.571  | 0.0925   | -0.257   | 0.316   | 0.401  |

|                      |                     |       |       |       |                |                |       |       |
|----------------------|---------------------|-------|-------|-------|----------------|----------------|-------|-------|
|                      | <i>Oc. dauurica</i> | 0.295 | 0.328 | 0.613 | -0.0331        | -0.318         | 0.297 | 0.428 |
| W Shapiro-Wilk       | <i>Oc. princeps</i> | 0.999 | 0.766 | 0.965 | 0.988          | 0.993          | 0.995 | 0.896 |
|                      | <i>Oc. collaris</i> | 0.971 | 0.997 | 0.988 | 0.636          | 0.636          | 0.963 | 0.765 |
|                      | <i>Oc. dauurica</i> | NaN   | NaN   | NaN   | NaN            | NaN            | NaN   | NaN   |
| P-value Shapiro-Wilk | <i>Oc. princeps</i> | 0.956 | 0.035 | 0.640 | 0.787          | 0.845          | 0.868 | 0.372 |
|                      | <i>Oc. collaris</i> | 0.848 | 0.989 | 0.949 | <b>0.002</b> * | <b>0.002</b> * | 0.796 | 0.053 |
|                      | <i>Oc. dauurica</i> | NaN   | NaN   | NaN   | NaN            | NaN            | NaN   | NaN   |

| Levene's test (excluding <i>Oc. dauurica</i> because N=1) |       |     |     |       |
|-----------------------------------------------------------|-------|-----|-----|-------|
|                                                           | F     | gl1 | gl2 | p     |
| logCA                                                     | 0.570 | 1   | 5   | 0.484 |
| logMA                                                     | 0.533 | 1   | 5   | 0.498 |
| logTA                                                     | 0.252 | 1   | 5   | 0.637 |
| logCA/MA                                                  | 0.277 | 1   | 5   | 0.621 |
| logCA/TA                                                  | 0.184 | 1   | 5   | 0.686 |
| logDAPm                                                   | 2.643 | 1   | 5   | 0.165 |
| logDTm                                                    | 0.805 | 1   | 5   | 0.411 |

## Graphics

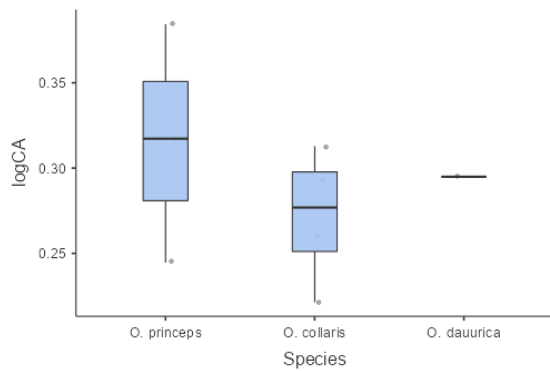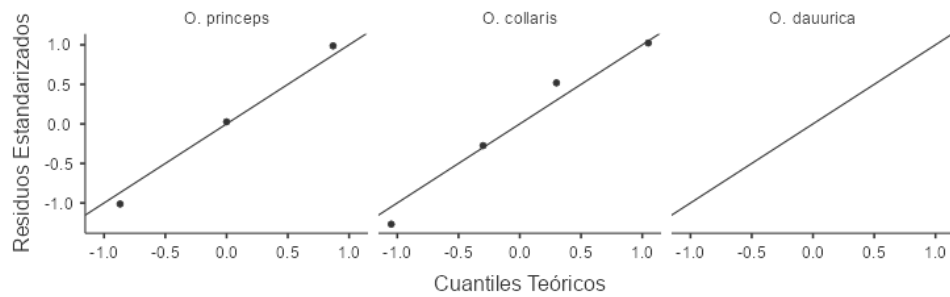

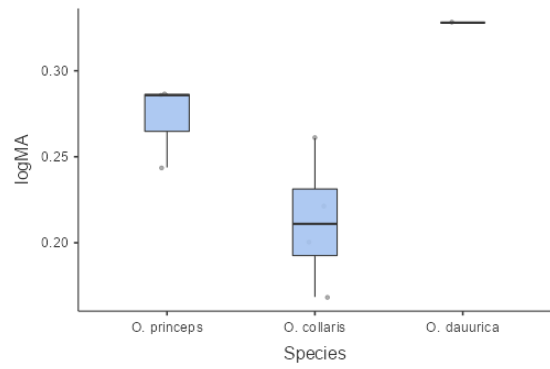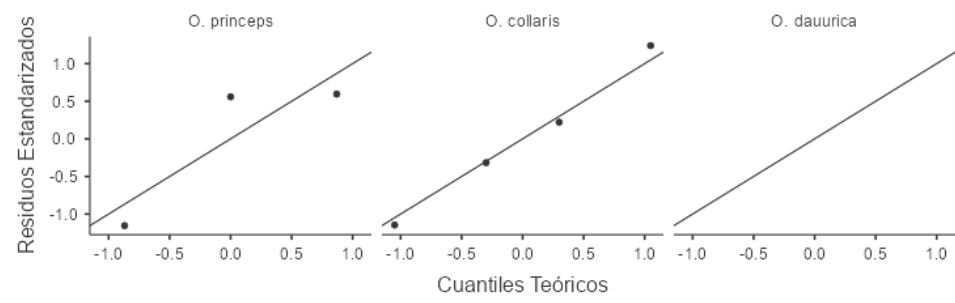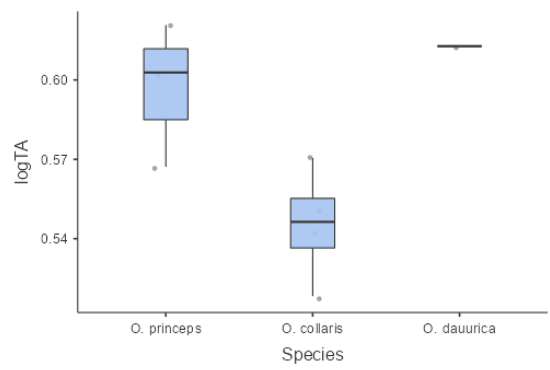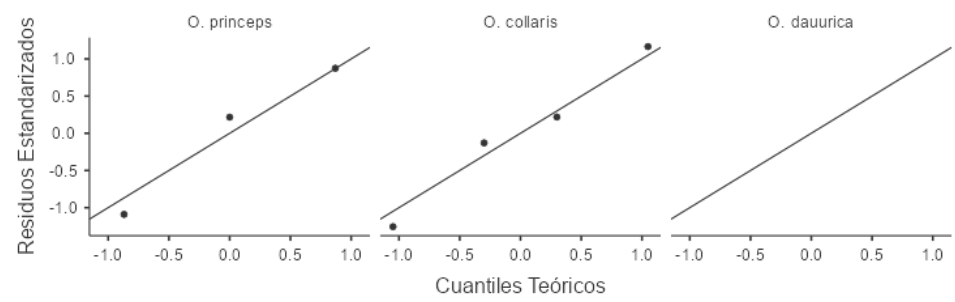



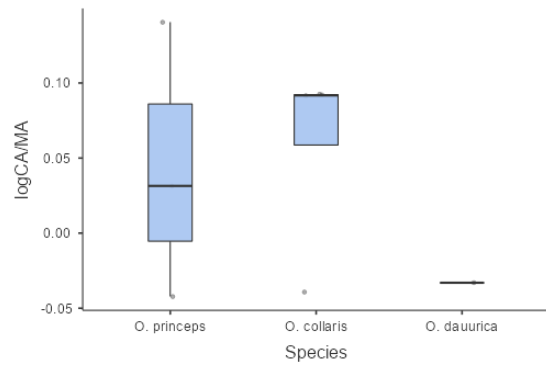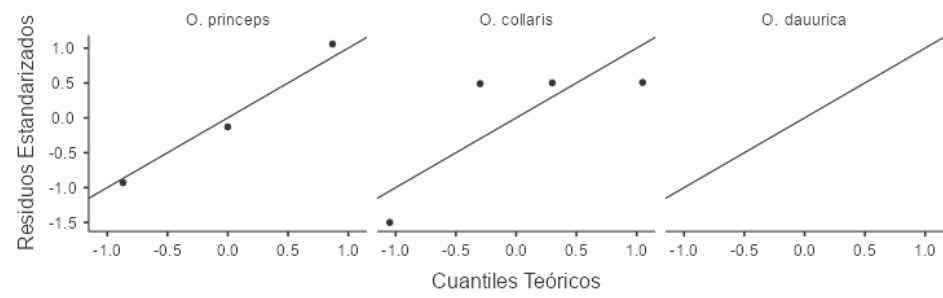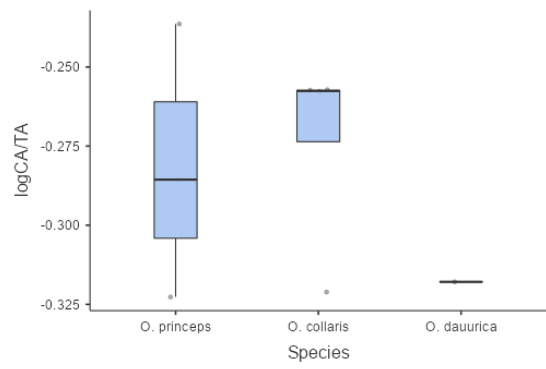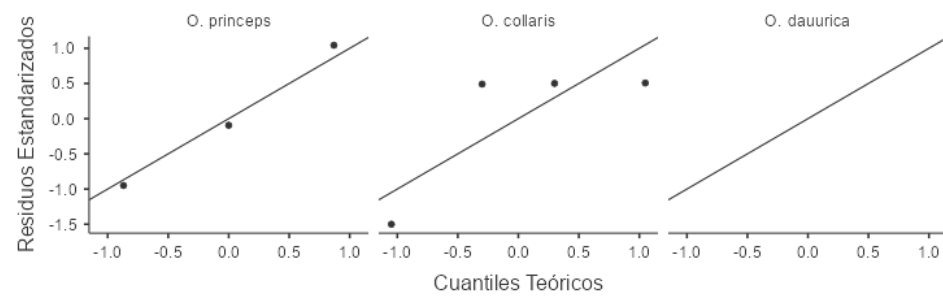

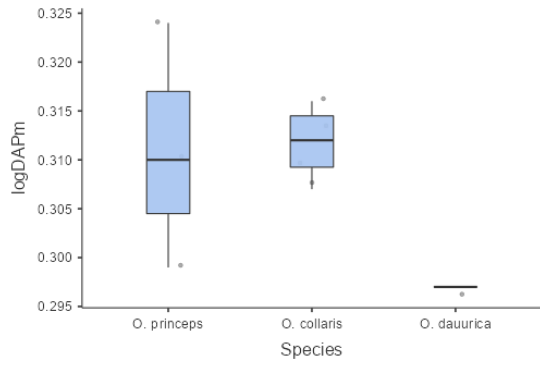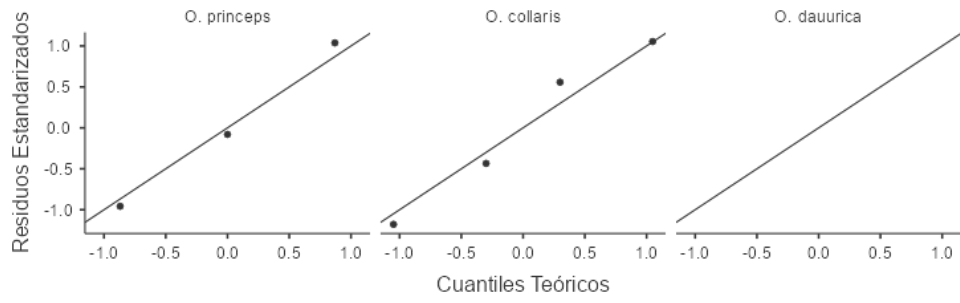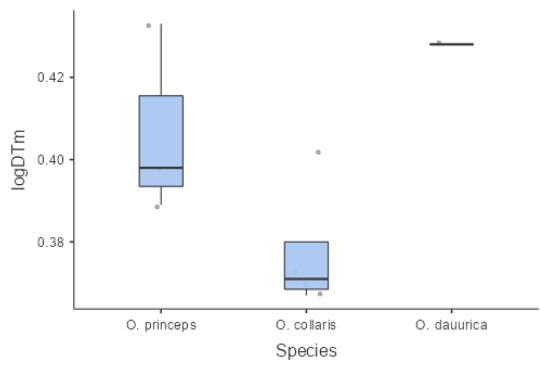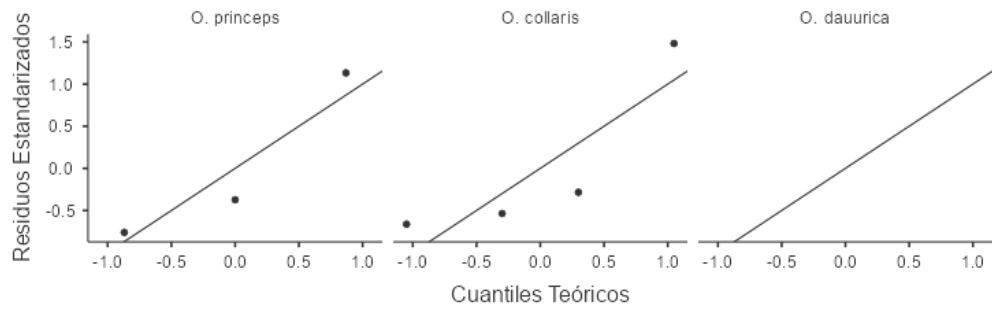



Levene's test (excluding *Oc. dauurica* because N=1)

|          | F     | g1 | g2 | p     |
|----------|-------|----|----|-------|
| logCA    | 0.398 | 2  | 6  | 0.688 |
| logMA    | 1.814 | 2  | 6  | 0.242 |
| logTA    | 1.177 | 2  | 6  | 0.370 |
| logCA/MA | 0.371 | 2  | 6  | 0.705 |
| logCA/TA | 0.530 | 2  | 6  | 0.614 |
| logDAPm  | 2.819 | 2  | 6  | 0.137 |
| logDTm   | 2.495 | 2  | 6  | 0.163 |

## Graphics

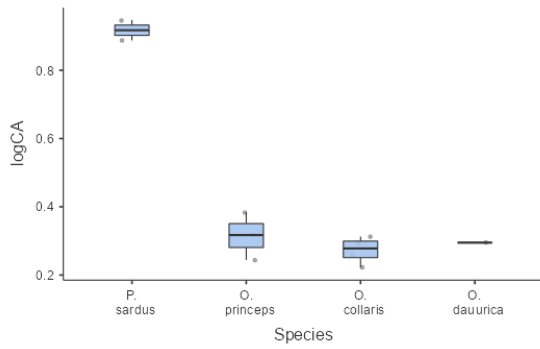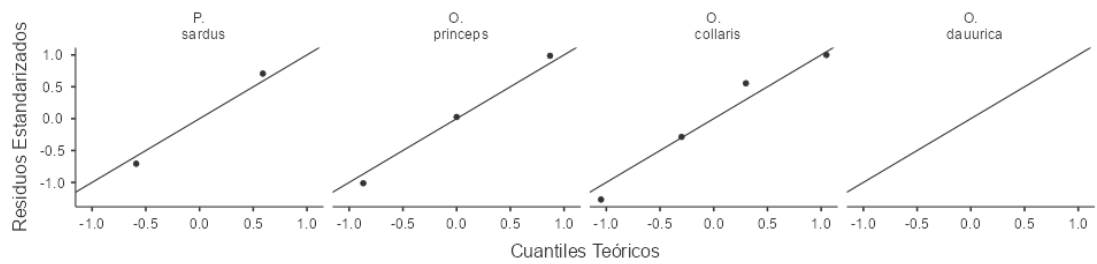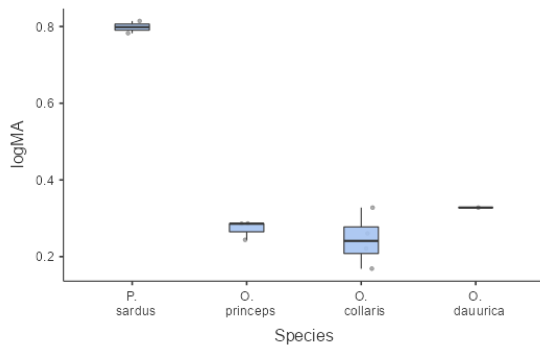

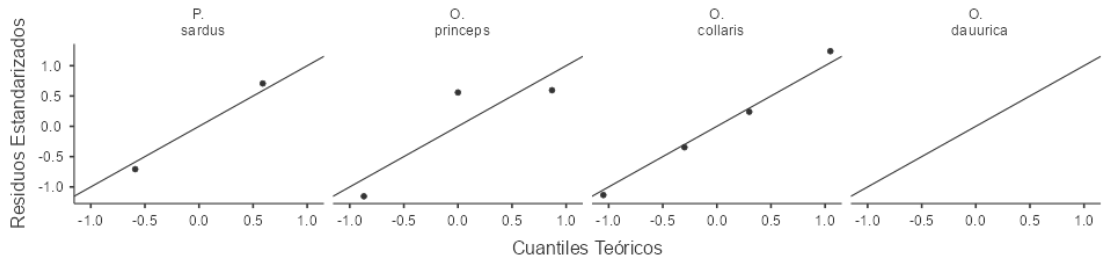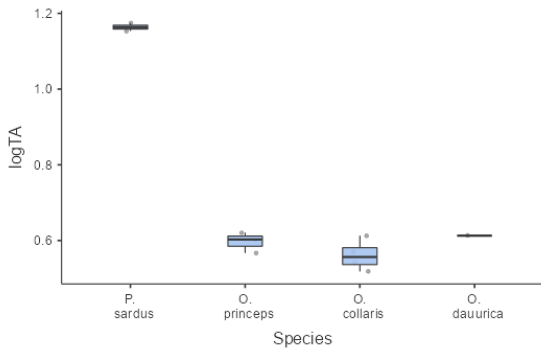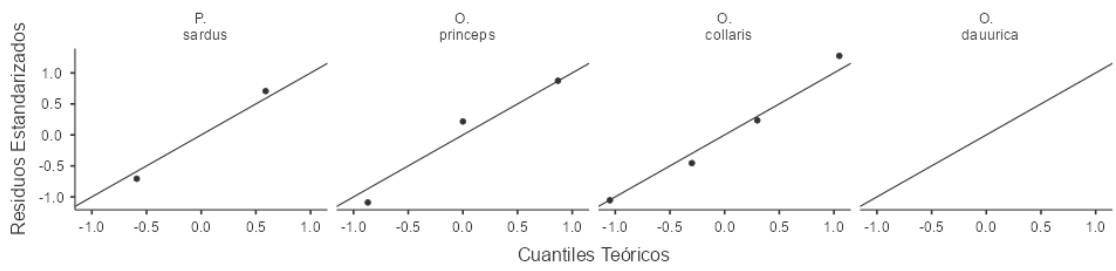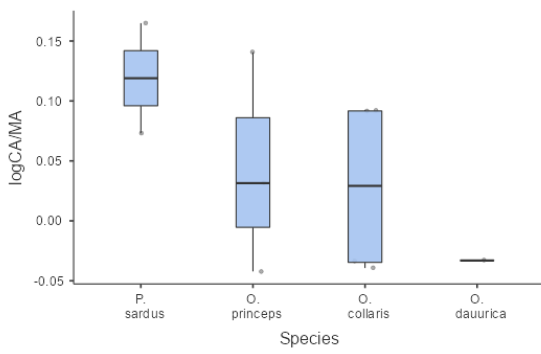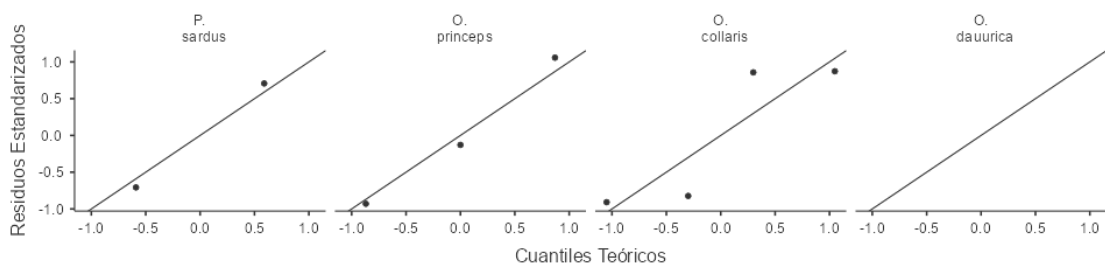

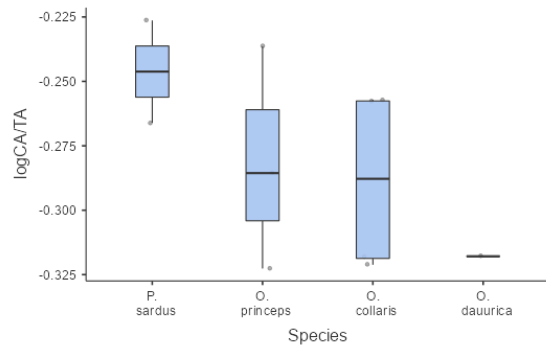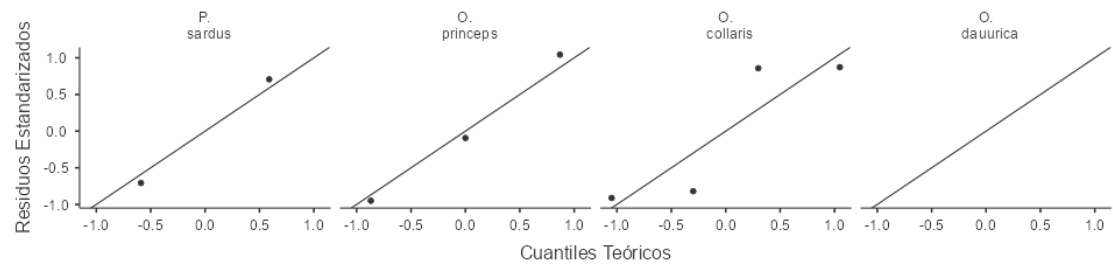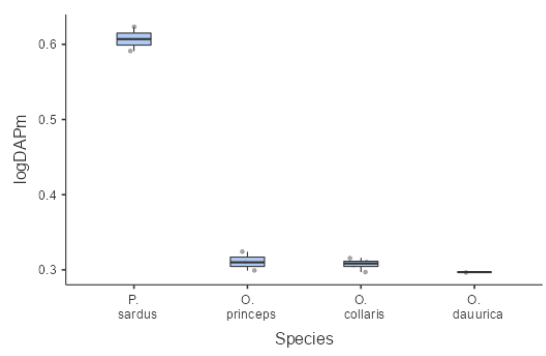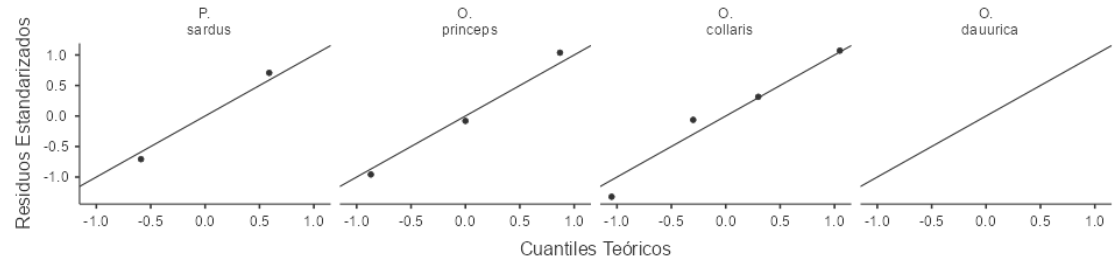

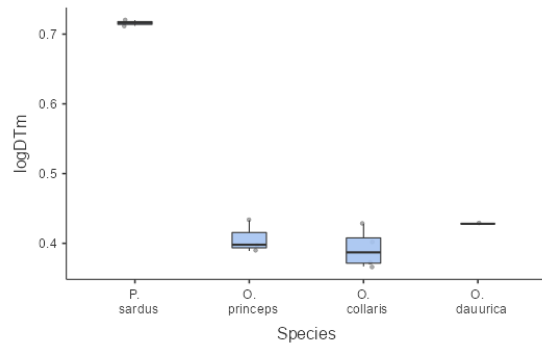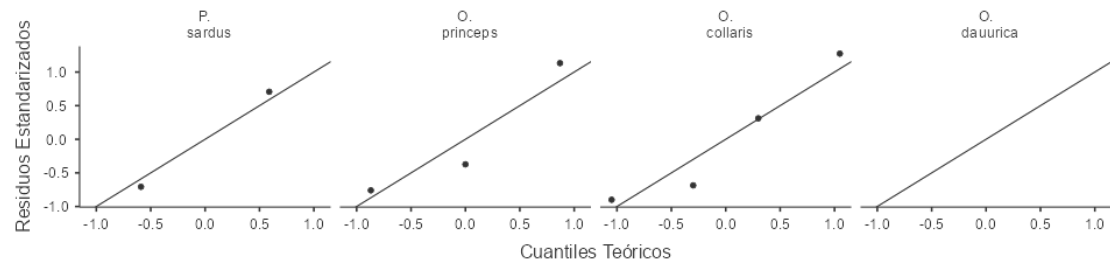

- Ochotona (all together) and P. sardus considering species (only adults).

Continuous variables (logCA, logMA, logTA, logCA/MA, logCA/TA, log DAPm, logDTm) and grouping variable [species: *Ochotona* (all together) and *P. sardus*].

|                         | Species         | logCA  | logMA  | logTA  | logCA/MA | logCA/TA | logDAPm | logDTm  |
|-------------------------|-----------------|--------|--------|--------|----------|----------|---------|---------|
| N                       | <i>Prolagus</i> | 2      | 2      | 2      | 2        | 2        | 2       | 2       |
|                         | <i>Ochotona</i> | 7      | 7      | 7      | 7        | 7        | 7       | 7       |
| Perdidos                | <i>Prolagus</i> | 0      | 0      | 0      | 0        | 0        | 0       | 0       |
|                         | <i>Ochotona</i> | 0      | 0      | 0      | 0        | 0        | 0       | 0       |
| Media                   | <i>Prolagus</i> | 0.917  | 0.798  | 1.16   | 0.119    | -0.246   | 0.607   | 0.716   |
|                         | <i>Ochotona</i> | 0.291  | 0.256  | 0.576  | 0.0345   | -0.286   | 0.309   | 0.398   |
| Mediana                 | <i>Prolagus</i> | 0.917  | 0.798  | 1.16   | 0.119    | -0.246   | 0.607   | 0.716   |
|                         | <i>Ochotona</i> | 0.295  | 0.261  | 0.571  | 0.0314   | -0.286   | 0.310   | 0.398   |
| Desviación estándar     | <i>Prolagus</i> | 0.0425 | 0.0225 | 0.0144 | 0.0650   | 0.0281   | 0.0226  | 0.00566 |
|                         | <i>Ochotona</i> | 0.0545 | 0.0517 | 0.0379 | 0.0750   | 0.0358   | 0.00935 | 0.0252  |
| Mínimo                  | <i>Prolagus</i> | 0.887  | 0.782  | 1.15   | 0.0730   | -0.266   | 0.591   | 0.712   |
|                         | <i>Ochotona</i> | 0.221  | 0.169  | 0.518  | -0.0422  | -0.323   | 0.297   | 0.367   |
| Máximo                  | <i>Prolagus</i> | 0.947  | 0.814  | 1.17   | 0.165    | -0.226   | 0.623   | 0.720   |
|                         | <i>Ochotona</i> | 0.384  | 0.328  | 0.621  | 0.141    | -0.236   | 0.324   | 0.433   |
| W de Shapiro-Wilk       | <i>Prolagus</i> | NaN    | NaN    | NaN    | NaN      | NaN      | NaN     | NaN     |
|                         | <i>Ochotona</i> | 0.962  | 0.976  | 0.942  | 0.870    | 0.867    | 0.957   | 0.931   |
| Valor p de Shapiro-Wilk | <i>Prolagus</i> | NaN    | NaN    | NaN    | NaN      | NaN      | NaN     | NaN     |
|                         | <i>Ochotona</i> | 0.840  | 0.937  | 0.656  | 0.186    | 0.174    | 0.796   | 0.561   |

| Levene's test |       |     |     |       |
|---------------|-------|-----|-----|-------|
|               | F     | gl1 | gl2 | p     |
| logCA         | 0.258 | 1   | 7   | 0.627 |
| logMA         | 1.027 | 1   | 7   | 0.345 |
| logTA         | 2.183 | 1   | 7   | 0.183 |
| logCA/MA      | 0.553 | 1   | 7   | 0.481 |
| logCA/TA      | 0.836 | 1   | 7   | 0.391 |
| logDAPm       | 4.671 | 1   | 7   | 0.067 |
| logDTm        | 1.966 | 1   | 7   | 0.204 |

## Graphics

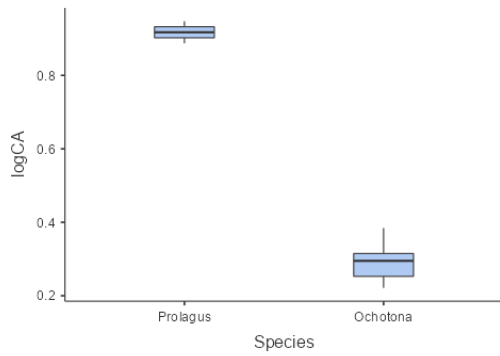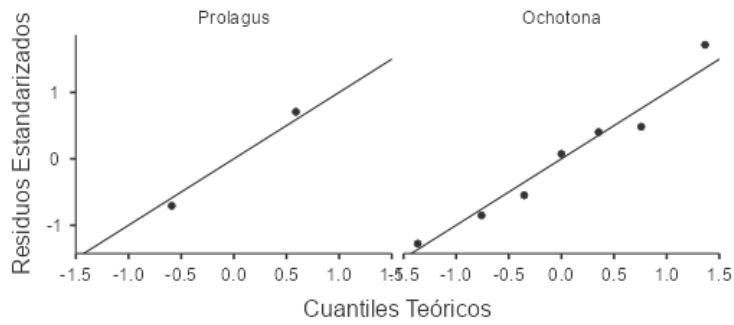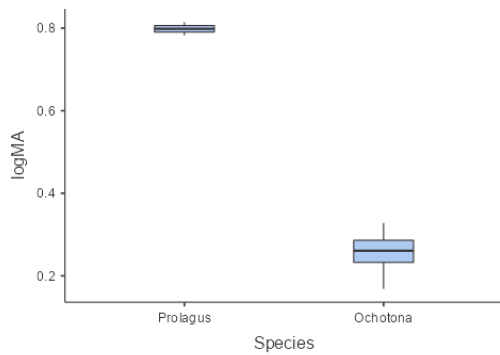



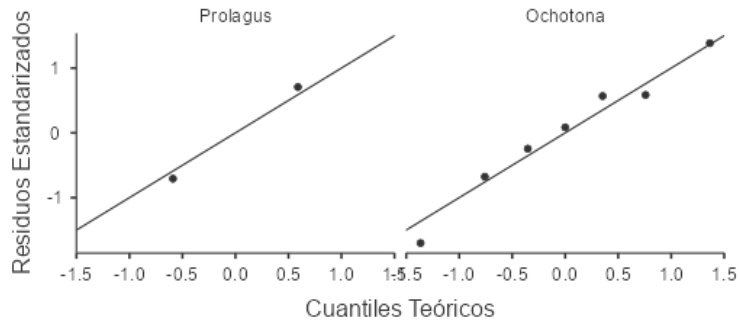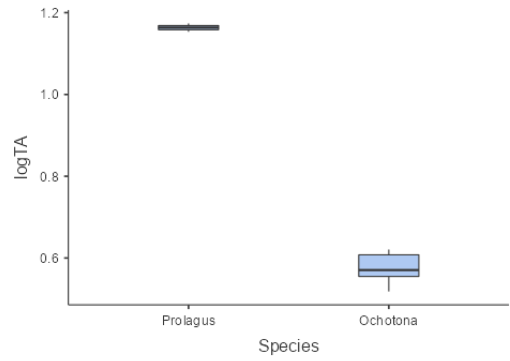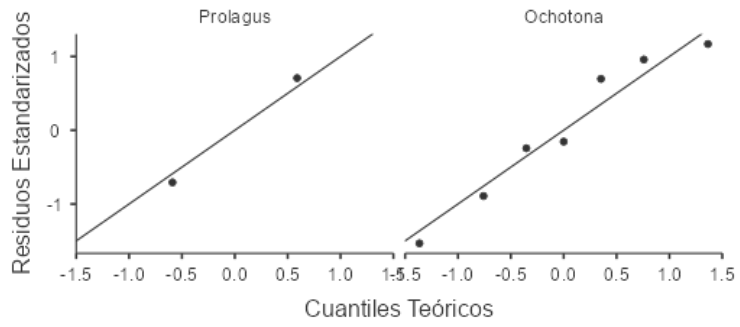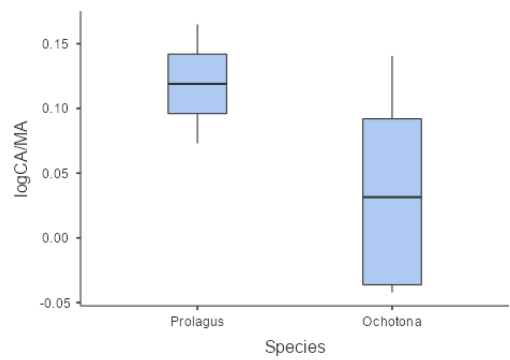

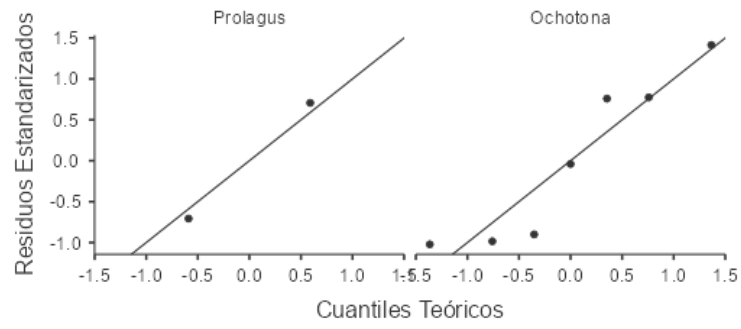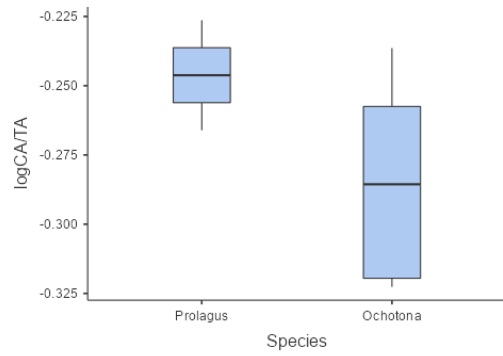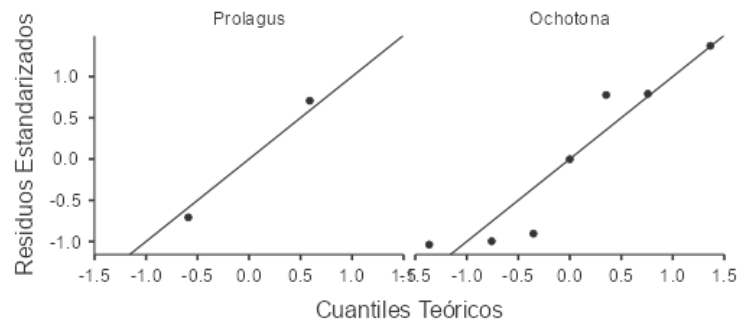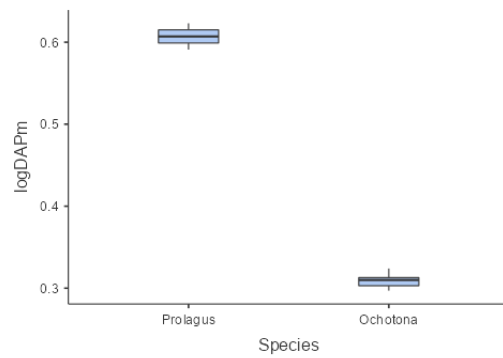

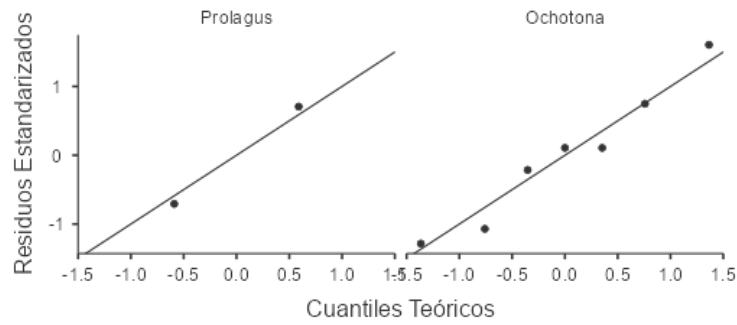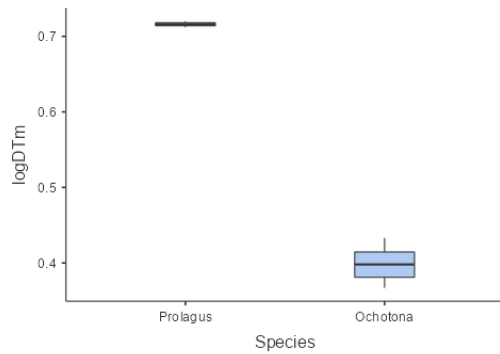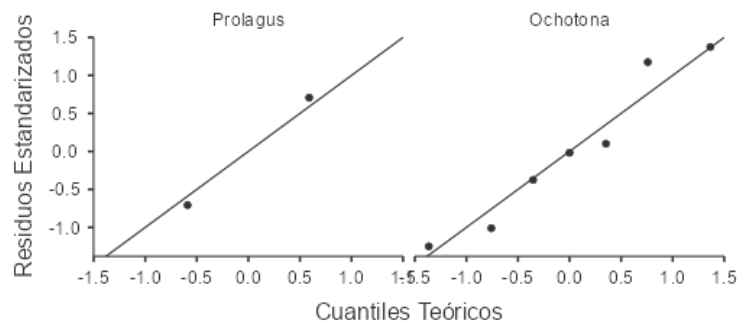

**2) TEST OF EQUALITY OF MEANS**

- *P. sardus* considering ontogenetic categories.

Dependent variables (logCA, logMA, logTA, logCA/MA, logCA/TA, log DAPm, logDTm) and grouping variable (age category: Juvenile, Young adult and Adult).

| Kruskal-Wallis |          |    |              |              |        |  |  |
|----------------|----------|----|--------------|--------------|--------|--|--|
|                | $\chi^2$ | gl | p            | $\epsilon^2$ |        |  |  |
| logCA          | 4.23     | 2  | 0.121        | 0.3019       |        |  |  |
| logMA          | 8.00     | 2  | <b>0.018</b> | *            | 0.5714 |  |  |
| logTA          | 8.05     | 2  | <b>0.018</b> | *            | 0.5751 |  |  |
| logCA/MA       | 1.06     | 2  | 0.588        |              | 0.0759 |  |  |
| logCA/TA       | 1.06     | 2  | 0.588        |              | 0.0759 |  |  |
| logDAPm        | 4.55     | 2  | 0.103        |              | 0.3252 |  |  |
| logDTm         | 7.95     | 2  | <b>0.019</b> | *            | 0.5682 |  |  |

### Dwass-Steel-Critchlow-Fligner pairwise comparisons

| logMA       |             |        |  |              |   |
|-------------|-------------|--------|--|--------------|---|
|             |             | W      |  | p            |   |
| Juvenile    | Young adult | 3.273  |  | <b>0.021</b> | * |
| Juvenile    | Adult       | 3.000  |  | <b>0.034</b> | * |
| Young adult | Adult       | -0.655 |  | 0.643        |   |

| logTA       |             |      |  |              |   |
|-------------|-------------|------|--|--------------|---|
|             |             | W    |  | p            |   |
| Juvenile    | Young adult | 3.06 |  | 0.145        |   |
| Juvenile    | Adult       | 3.00 |  | <b>0.043</b> | * |
| Young adult | Adult       | 1.96 |  | 1.000        |   |

| logDTm      |             |      |  |              |   |
|-------------|-------------|------|--|--------------|---|
|             |             | W    |  | p            |   |
| Juvenile    | Young adult | 2.84 |  | <b>0.044</b> | * |
| Juvenile    | Adult       | 3.00 |  | <b>0.034</b> | * |
| Young adult | Adult       | 2.62 |  | 0.064        |   |

- Ochotona considering species (only adults).

Dependent variables (logCA, logMA, logTA, logCA/MA, logCA/TA, log DAPm, logDTm) and grouping variable (species: *Oc. princeps* and *Oc. collaris*). *Oc. dauurica* is not considered because N=1.

| ANOVA (Fisher) |        |    |    |              |   |
|----------------|--------|----|----|--------------|---|
|                | F      | g1 | g2 | p            |   |
| logCA          | 1.1083 | 1  | 5  | 0.341        |   |
| logMA          | 5.2894 | 1  | 5  | 0.070        |   |
| logTA          | 7.8795 | 1  | 5  | <b>0.038</b> | * |
| logDAPm        | 0.0133 | 1  | 5  | 0.913        |   |
| logDTm         | 3.9722 | 1  | 5  | 0.103        |   |

| Kruskal-Wallis |          |    |       |              |  |
|----------------|----------|----|-------|--------------|--|
|                | $\chi^2$ | g1 | p     | $\epsilon^2$ |  |
| logCA/MA       | 0.125    | 1  | 0.724 | 0.0208       |  |
| logCA/TA       | 0.125    | 1  | 0.724 | 0.0208       |  |

- Ochotona (3 species) and *P. sardus* considering species (only adults).

Dependent variables (logCA, logMA, logTA, logCA/MA, logCA/TA, log DAPm, logDTm) and grouping variable (species: *P. sardus*, *Oc. princeps* and *Oc. collaris*). *Oc. dauurica* is not considered because N=1.

| Kruskal-Wallis |          |    |              |              |       |
|----------------|----------|----|--------------|--------------|-------|
|                | $\chi^2$ | g1 | p            | $\epsilon^2$ |       |
| logCA          | 4.90     | 2  | 0.086        | 0.612        |       |
| logMA          | 6.14     | 2  | <b>0.046</b> | *            | 0.768 |
| logTA          | 6.14     | 2  | <b>0.046</b> | *            | 0.768 |
| logCA/MA       | 1.00     | 2  | 0.607        | 0.125        |       |

|          |      |   |       |       |
|----------|------|---|-------|-------|
| logCA/TA | 1.00 | 2 | 0.607 | 0.125 |
| logDAPm  | 4.25 | 2 | 0.119 | 0.532 |
| logDTm   | 5.44 | 2 | 0.066 | 0.681 |

### Dwass-Steel-Critchlow-Fligner pairwise comparisons

| logMA               |                     |       |              |   |
|---------------------|---------------------|-------|--------------|---|
|                     |                     | W     | p            |   |
| <i>P. sardus</i>    | <i>Oc. princeps</i> | -2.45 | 0.257        |   |
| <i>P. sardus</i>    | <i>Oc. collaris</i> | -2.62 | <b>0.015</b> | * |
| <i>Oc. princeps</i> | <i>Oc. collaris</i> | -2.50 | 0.163        |   |

| logTA               |                     |       |              |   |
|---------------------|---------------------|-------|--------------|---|
|                     |                     | W     | p            |   |
| <i>P. sardus</i>    | <i>Oc. princeps</i> | -2.45 | 0.257        |   |
| <i>P. sardus</i>    | <i>Oc. collaris</i> | -2.62 | <b>0.015</b> | * |
| <i>Oc. princeps</i> | <i>Oc. collaris</i> | -2.50 | 0.163        |   |

- *Ochotona* (all together) and *P. sardus* considering species (only adults).

Dependent variables (logCA, logMA, logTA, logCA/MA, logCA/TA, log DAPm, logDTm) and grouping variable [species: *Prolagus* and *Ochotona* (all together)].

| Kruskal-Wallis |          |    |              |              |       |
|----------------|----------|----|--------------|--------------|-------|
|                | $\chi^2$ | gl | p            | $\epsilon^2$ |       |
| logCA          | 4.36     | 1  | <b>0.037</b> | *            | 0.485 |
| logMA          | 4.36     | 1  | <b>0.037</b> | *            | 0.485 |
| logTA          | 4.36     | 1  | <b>0.037</b> | *            | 0.485 |
| logCA/MA       | 1.09     | 1  | 0.296        |              | 0.121 |
| logCA/TA       | 1.09     | 1  | 0.296        |              | 0.121 |
| logDAPm        | 4.39     | 1  | <b>0.036</b> | *            | 0.488 |
| logDTm         | 4.36     | 1  | <b>0.037</b> | *            | 0.485 |

### 3) ANALYSIS OF COVARIANCE

- *Ochotona* (all together) and *P. sardus* considering species (only adults).

| ANCOVA - logCA    |                |    |                |        |              |   |
|-------------------|----------------|----|----------------|--------|--------------|---|
|                   | Sum of squares | gl | Quadratic mean | F      | p            |   |
| Overall model     | 0.6501         | 3  | 0.21671        | 220.63 | <.001        | * |
| Species           | 0.0326         | 1  | 0.03261        | 6.99   | <b>0.014</b> | * |
| logDAPm           | 0.5673         | 1  | 0.56732        | 121.58 | <.001        | * |
| logDAPm * Species | 0.0502         | 1  | 0.05022        | 10.76  | <b>0.003</b> | * |
| Residuals         | 0.1120         | 24 | 0.00467        |        |              |   |

| Levene's test |     |     |       |  |
|---------------|-----|-----|-------|--|
| F             | gl1 | gl2 | p     |  |
| 0.0528        | 1   | 26  | 0.820 |  |

| Shapiro-Wilk's test |       |
|---------------------|-------|
| Statistic           | p     |
| 0.976               | 0.751 |

Estimated Marginal means

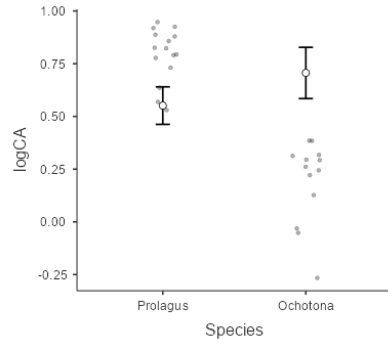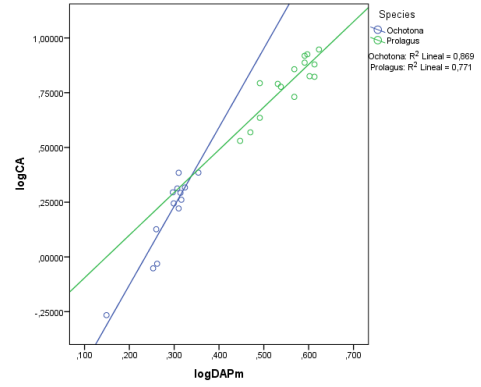

---

| ANCOVA - logCA   |                |    |                |         |       |   |  |
|------------------|----------------|----|----------------|---------|-------|---|--|
|                  | Sum of squares | gl | Quadratic mean | F       | p     |   |  |
| Overall model    | 0.58528        | 3  | 0.19509        | 333.752 | <.001 | * |  |
| Species          | 0.00301        | 1  | 0.00301        | 0.963   | 0.336 |   |  |
| logDTm           | 0.57422        | 1  | 0.57422        | 183.939 | <.001 | * |  |
| logDTm * Species | 0.00805        | 1  | 0.00805        | 2.580   | 0.121 |   |  |
| Residuals        | 0.07492        | 24 | 0.00312        |         |       |   |  |

| Levene's test |     |     |       |  |
|---------------|-----|-----|-------|--|
| F             | gl1 | gl2 | p     |  |
| 0.985         | 1   | 26  | 0.330 |  |

| Shapiro-Wilk's test |       |
|---------------------|-------|
| Statistic           | p     |
| 0.983               | 0.923 |

Estimated Marginal means

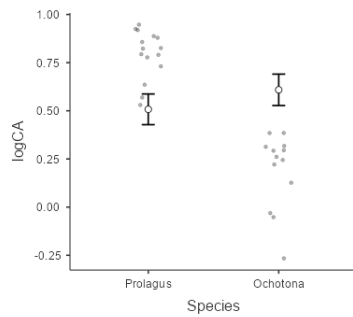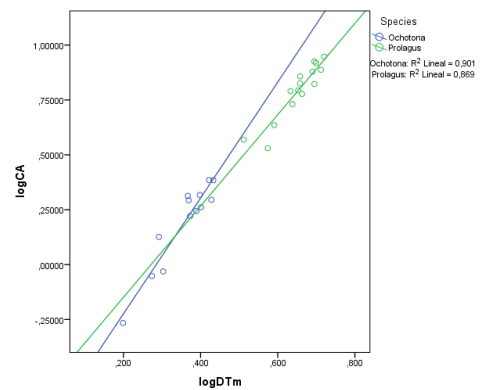

| ANCOVA - logCA |                |    |             |        |        |   |  |
|----------------|----------------|----|-------------|--------|--------|---|--|
|                | Sum of Squares | df | Mean Square | F      | p      |   |  |
| Overall model  | 0.6132         | 2  | 0.30660     | 469.66 | < .001 | * |  |
| Species        | 0.0115         | 1  | 0.01152     | 3.47   | 0.074  |   |  |
| logDTm         | 0.6017         | 1  | 0.60168     | 181.28 | < .001 | * |  |
| Residuals      | 0.0830         | 25 | 0.00332     |        |        |   |  |

| Homogeneity of Variances Test (Levene's) |     |     |       |
|------------------------------------------|-----|-----|-------|
| F                                        | df1 | df2 | p     |
| 1.74                                     | 1   | 26  | 0.199 |

| Normality Test (Shapiro-Wilk) |       |
|-------------------------------|-------|
| Statistic                     | p     |
| 0.973                         | 0.677 |

-----

| ANCOVA - logMA    |                |    |                |        |        |   |
|-------------------|----------------|----|----------------|--------|--------|---|
|                   | Sum of squares | gl | Quadratic mean | F      | p      |   |
| Overall model     | 0.07804        | 3  | 0.02601        | 190.08 | < .001 | * |
| Species           | 0.00324        | 1  | 0.00324        | 1.08   | 0.310  |   |
| logDAPm           | 0.05599        | 1  | 0.05599        | 18.59  | < .001 | * |
| logDAPm * Species | 0.01881        | 1  | 0.01881        | 6.24   | 0.020  | * |
| Residuals         | 0.07230        | 24 | 0.00301        |        |        |   |

| Levene's test |     |     |       |
|---------------|-----|-----|-------|
| F             | gl1 | gl2 | p     |
| 0.780         | 1   | 26  | 0.385 |

| Shapiro-Wilk's test |       |
|---------------------|-------|
| Statistic           | p     |
| 0.964               | 0.434 |

Estimated Marginal Means

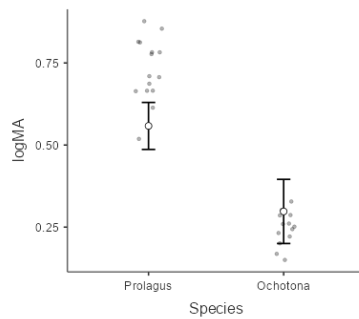

----

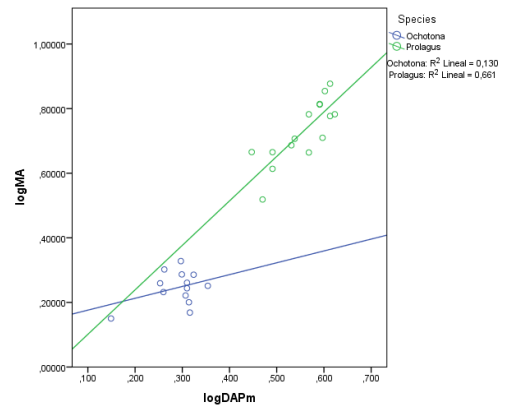

| ANCOVA - logMA   |                |    |                |        |              |   |
|------------------|----------------|----|----------------|--------|--------------|---|
|                  | Sum of squares | gl | Quadratic mean | F      | p            |   |
| Overall model    | 0.09363        | 3  | 0.03121        | 161.25 | <.001        | * |
| Species          | 0.00530        | 1  | 0.00530        | 1.50   | 0.232        |   |
| logDTm           | 0.06297        | 1  | 0.06297        | 17.86  | <.001        | * |
| logDTm * Species | 0.02536        | 1  | 0.02536        | 7.19   | <b>0.013</b> | * |
| Residuals        | 0.08462        | 24 | 0.00353        |        |              |   |

| Levene's test |     |     |       |  |
|---------------|-----|-----|-------|--|
| F             | gl1 | gl2 | p     |  |
| 0.842         | 1   | 26  | 0.367 |  |

| Shapiro-Wilk's test |       |  |
|---------------------|-------|--|
| Statistic           | p     |  |
| 0.993               | 0.999 |  |

Estimated Marginal Means

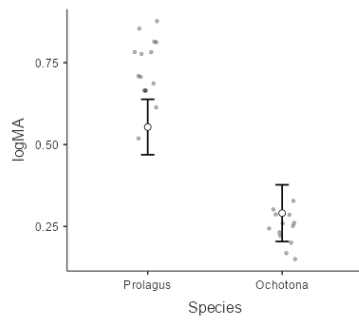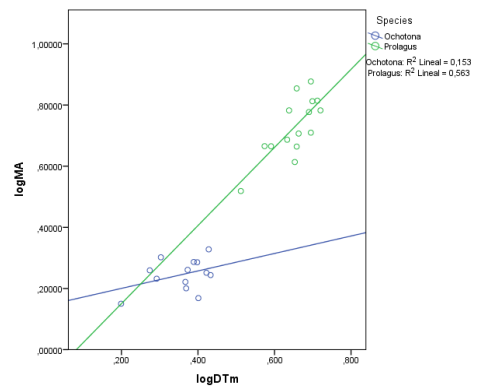

| ANCOVA - logTA    |                |    |                |          |       |   |
|-------------------|----------------|----|----------------|----------|-------|---|
|                   | Sum of squares | gl | Quadratic mean | F        | p     |   |
| Overall model     | 0.21318        | 3  | 0.07106        | 603.2637 | <.001 | * |
| Species           | 0.00119        | 1  | 0.00119        | 0.9719   | 0.334 |   |
| logDAPm           | 0.21193        | 1  | 0.21193        | 172.5755 | <.001 | * |
| logDAPm * Species | 5.41e-5        | 1  | 5.41e-5        | 0.0440   | 0.836 |   |
| Residuals         | 0.02947        | 24 | 0.00123        |          |       |   |

| Levene's test |     |     |       |  |
|---------------|-----|-----|-------|--|
| F             | gl1 | gl2 | p     |  |
| 0.160         | 1   | 26  | 0.692 |  |

| Shapiro-Wilk's test |       |  |
|---------------------|-------|--|
| Statistic           | p     |  |
| 0.980               | 0.851 |  |



Estimated Marginal Means

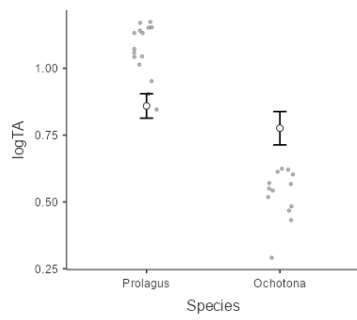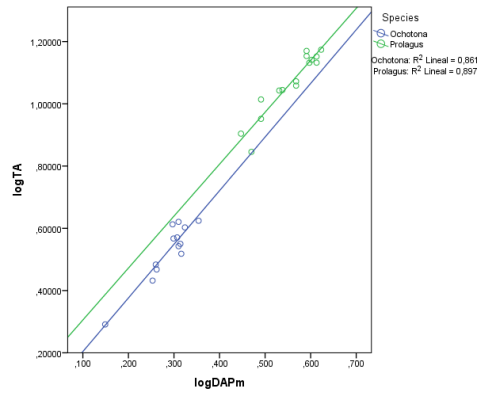

| ANCOVA - logTA |                |    |             |        |              |   |  |
|----------------|----------------|----|-------------|--------|--------------|---|--|
|                | Sum of Squares | df | Mean Square | F      | p            |   |  |
| Overall model  | 0.22637        | 2  | 0.11319     | 940.85 | < .001       | * |  |
| Species        | 0.00681        | 1  | 0.00681     | 5.77   | <b>0.024</b> | * |  |
| logDAPm        | 0.21956        | 1  | 0.21956     | 185.90 | < .001       | * |  |
| Residuals      | 0.02953        | 25 | 0.00118     |        |              |   |  |

| Homogeneity of Variances Test (Levene's) |     |     |       |  |
|------------------------------------------|-----|-----|-------|--|
| F                                        | df1 | df2 | p     |  |
| 0.117                                    | 1   | 26  | 0.735 |  |

| Normality Test (Shapiro-Wilk) |       |
|-------------------------------|-------|
| Statistic                     | p     |
| 0.980                         | 0.857 |

----

| ANCOVA - logTA   |                |    |                |        |              |   |
|------------------|----------------|----|----------------|--------|--------------|---|
|                  | Sum of squares | gl | Quadratic mean | F      | p            |   |
| Overall model    | 0.23441        | 3  | 0.07814        | 877.64 | < .001       | * |
| Species          | 0.00115        | 1  | 0.00115        | 1.35   | 0.256        |   |
| logDTm           | 0.22871        | 1  | 0.22871        | 269.83 | < .001       | * |
| logDTm * Species | 0.00455        | 1  | 0.00455        | 5.37   | <b>0.029</b> | * |
| Residuals        | 0.02034        | 24 | 8.48e-4        |        |              |   |

| Levene's test |     |     |       |
|---------------|-----|-----|-------|
| F             | gl1 | gl2 | p     |
| 0.0614        | 1   | 26  | 0.806 |

| Shapiro-Wilk's test |       |
|---------------------|-------|
| Statistic           | p     |
| 0.964               | 0.426 |

Estimated Marginal Means

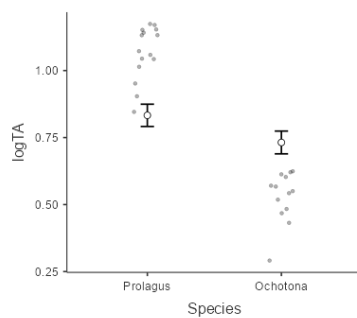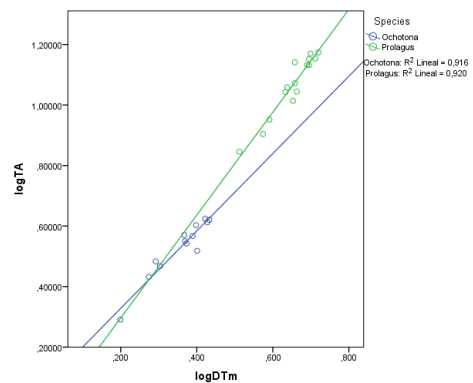

**Table S1.**

| Species             | Specimen    | Laterality | Growth plate status (proximal/distal) | Age | DAPm | DTm  | FLmax | FTDp  | FAPDd | FTDd  | BM     |
|---------------------|-------------|------------|---------------------------------------|-----|------|------|-------|-------|-------|-------|--------|
| <i>P. sardus</i>    | R129        | R          | NF/B                                  | J   | 2.80 | 3.75 | 28.05 | -     | -     | -     | -      |
| <i>P. sardus</i>    | R77         | R          | NF/NF                                 | J   | 2.95 | 3.25 | 29.10 | -     | -     | -     | -      |
| <i>P. sardus</i>    | R113        | R          | NF/NF                                 | J   | 3.10 | 3.90 | 31.55 | -     | -     | -     | -      |
| <i>P. sardus</i>    | <u>R137</u> | R          | NF/B                                  | J   | 3.10 | 4.50 | 34.95 | -     | -     | -     | -      |
| <i>P. sardus</i>    | GD52        | R          | NF/NF                                 | J   | 3.70 | 4.35 | 38.55 | -     | -     | -     | -      |
| <i>P. sardus</i>    | R000        | R          | NF/NF                                 | J   | 3.40 | 4.30 | 39.65 | -     | -     | -     | -      |
| <i>P. sardus</i>    | R136        | R          | B/NF                                  | Y   | 4.10 | 4.95 | -     | -     | -     | -     | -      |
| <i>P. sardus</i>    | R30         | R          | NF/NF                                 | J   | 3.70 | 4.55 | 42.60 | -     | -     | -     | -      |
| <i>P. sardus</i>    | <u>GD19</u> | R          | NF/NF                                 | J   | 4.10 | 4.90 | 44.80 | -     | -     | -     | -      |
| <i>P. sardus</i>    | <u>D19</u>  | R          | NF/NF                                 | J   | 3.95 | 4.95 | 46.40 | -     | -     | -     | -      |
| <i>P. sardus</i>    | R12         | R          | SL/B                                  | Y   | 3.45 | 4.60 | -     | -     | -     | -     | -      |
| <i>P. sardus</i>    | A17         | R          | F/SL                                  | Y   | 4.00 | 4.55 | 49.75 | 11.25 | 10.45 | 9.25  | 662.27 |
| <i>P. sardus</i>    | R44         | R          | F/SL                                  | Y   | 3.90 | 5.00 | -     | -     | 9.65  | 9.00  | 569.11 |
| <i>P. sardus</i>    | R5          | R          | F/F                                   | A   | 4.20 | 5.25 | -     | 11.25 | -     | -     | 663.09 |
| <i>P. sardus</i>    | <u>B045</u> | R          | F/F                                   | A   | 3.90 | 5.15 | -     | 11.40 | 10.80 | 10.00 | 730.28 |
| <i>Oc. collaris</i> | UAM 2929    | L          | F/F                                   | A   | 2.04 | 2.36 | 27.93 | 5.79  | 5.32  | 5.27  | 124.10 |
| <i>Oc. collaris</i> | UAM 2947    | L          | F/F                                   | A   | 2.03 | 2.33 | 28.01 | 5.65  | 5.47  | 5.33  | 126.90 |
| <i>Oc. collaris</i> | UAM 58315   | L          | SL/SL                                 | Y   | 1.79 | 1.88 | 24.06 | 5.13  | 4.49  | 4.91  | 67.00  |
| <i>Oc. collaris</i> | UAM 63933   | L          | F/F                                   | A   | 2.06 | 2.34 | 28.67 | 5.45  | 5.34  | 5.35  | 121.20 |
| <i>Oc. collaris</i> | UAM 63937   | L          | F/F                                   | A   | 2.07 | 2.52 | 28.12 | 5.75  | 5.35  | 5.39  | 122.30 |
| <i>Oc. dauurica</i> | MSB 215075  | L          | F/SL                                  | Y   | 1.82 | 1.96 | 23.20 | 5.44  | 5.30  | 5.25  | 81.00  |
| <i>Oc. dauurica</i> | MSB 215674  | L          | NF/NF                                 | J   | 1.83 | 2.01 | -     | 4.77  | -     | -     | 48.00  |
| <i>Oc. dauurica</i> | MSB 215680  | L          | SL/SL                                 | Y   | 2.26 | 2.64 | 27.17 | 6.09  | 6.16  | 5.61  | 139.00 |
| <i>Oc. dauurica</i> | MSB 215940  | L          | NF/NF                                 | J   | 1.41 | 1.58 | -     | -     | -     | -     | 25.00  |
| <i>Oc. dauurica</i> | MSB 215953  | L          | F/F                                   | A   | 1.98 | 2.68 | 30.01 | 6.25  | 6.07  | 5.73  | 141.00 |

|                     |            |   |     |   |      |      |       |      |      |      |        |
|---------------------|------------|---|-----|---|------|------|-------|------|------|------|--------|
| <i>Oc. princeps</i> | UAM 35060  | L | F/F | A | 2.04 | 2.71 | 29.64 | 6.14 | 5.45 | 5.25 | 130.00 |
| <i>Oc. princeps</i> | UAM 35119  | L | F/F | A | 1.99 | 2.45 | 27.51 | 5.61 | 5.55 | 5.38 | -      |
| <i>Oc. princeps</i> | UAM 113936 | L | F/F | A | 2.11 | 2.5  | 28.72 | 5.89 | 5.56 | 5.48 | 144.00 |

---

**Table S2.**

| Species             | Specimen     | Age category | Geometric data        |                       |                       |         |         |         |         |         |           |           | Size data |          |          |         |         |
|---------------------|--------------|--------------|-----------------------|-----------------------|-----------------------|---------|---------|---------|---------|---------|-----------|-----------|-----------|----------|----------|---------|---------|
|                     |              |              | CA (mm <sup>2</sup> ) | MA (mm <sup>2</sup> ) | TA (mm <sup>2</sup> ) | CA/MA   | CA/TA   | logCA   | logMA   | logTA   | logCA/M A | logCA/T A | DAPM (mm) | logDAP M | DTM (mm) | logDT M | BM (g)  |
| <i>P. sardus</i>    | R129         | Juvenile     | 3.389                 | 4.629                 | 8.018                 | 0.73212 | 0.42267 | 0.53007 | 0.66549 | 0.90407 | -0.13542  | -0.37399  | 2.80      | 0.447    | 3.75     | 0.574   | -       |
| <i>P. sardus</i>    | R77          | Juvenile     | 3.708                 | 3.301                 | 7.009                 | 1.12330 | 0.52903 | 0.56914 | 0.51865 | 0.84566 | 0.05049   | -0.27652  | 2.95      | 0.470    | 3.25     | 0.512   | -       |
| <i>P. sardus</i>    | R113         | Juvenile     | 4.320                 | 4.626                 | 8.946                 | 0.93385 | 0.48290 | 0.63548 | 0.66521 | 0.95163 | -0.02972  | -0.31615  | 3.10      | 0.491    | 3.90     | 0.591   | -       |
| <i>P. sardus</i>    | R137         | Juvenile     | 6.218                 | 4.108                 | 10.326                | 1.51363 | 0.60217 | 0.79365 | 0.61363 | 1.01393 | 0.18002   | -0.22028  | 3.10      | 0.491    | 4.50     | 0.653   | -       |
| <i>P. sardus</i>    | GD52         | Juvenile     | 5.382                 | 6.058                 | 11.440                | 0.88841 | 0.47045 | 0.73094 | 0.78233 | 1.05843 | -0.05139  | -0.32748  | 3.70      | 0.568    | 4.35     | 0.638   | -       |
| <i>P. sardus</i>    | R000         | Juvenile     | 6.172                 | 4.860                 | 11.032                | 1.26996 | 0.55946 | 0.79043 | 0.68664 | 1.04265 | 0.10379   | -0.25223  | 3.40      | 0.531    | 4.30     | 0.633   | -       |
| <i>P. sardus</i>    | R136         | Young adult  | 6.650                 | 7.535                 | 14.185                | 0.88255 | 0.46881 | 0.82282 | 0.87708 | 1.15183 | -0.05426  | -0.32901  | 4.10      | 0.613    | 4.95     | 0.695   | -       |
| <i>P. sardus</i>    | R30          | Juvenile     | 7.198                 | 4.614                 | 11.812                | 1.56003 | 0.60938 | 0.85721 | 0.66408 | 1.07232 | 0.19313   | -0.21511  | 3.70      | 0.568    | 4.55     | 0.658   | -       |
| <i>P. sardus</i>    | GD19         | Juvenile     | 7.569                 | 5.983                 | 13.552                | 1.26508 | 0.55852 | 0.87904 | 0.77692 | 1.13200 | 0.10212   | -0.25296  | 4.10      | 0.613    | 4.90     | 0.690   | -       |
| <i>P. sardus</i>    | D19          | Juvenile     | 8.420                 | 5.124                 | 13.544                | 1.64325 | 0.62168 | 0.92531 | 0.70961 | 1.13175 | 0.21570   | -0.20643  | 3.95      | 0.597    | 4.95     | 0.695   | -       |
| <i>P. sardus</i>    | R12          | Young adult  | 5.988                 | 5.089                 | 11.077                | 1.17666 | 0.54058 | 0.77728 | 0.70663 | 1.04442 | 0.07065   | -0.26714  | 3.45      | 0.538    | 4.60     | 0.663   | -       |
| <i>P. sardus</i>    | A17          | Young adult  | 6.690                 | 7.150                 | 13.840                | 0.93566 | 0.48338 | 0.82543 | 0.85431 | 1.14114 | -0.02888  | -0.31571  | 4.00      | 0.602    | 4.55     | 0.658   | 662.268 |
| <i>P. sardus</i>    | R44          | Young adult  | 8.294                 | 6.494                 | 14.788                | 1.27718 | 0.56086 | 0.91876 | 0.81251 | 1.16991 | 0.10625   | -0.25115  | 3.90      | 0.591    | 5.00     | 0.699   | 569.106 |
| <i>P. sardus</i>    | R5           | Adult        | 8.859                 | 6.060                 | 14.919                | 1.46188 | 0.59381 | 0.94738 | 0.78247 | 1.17374 | 0.16491   | -0.22636  | 4.20      | 0.623    | 5.25     | 0.720   | 663.089 |
| <i>P. sardus</i>    | B045         | Adult        | 7.714                 | 6.520                 | 14.234                | 1.18313 | 0.54194 | 0.88728 | 0.81425 | 1.15333 | 0.07303   | -0.26605  | 3.90      | 0.591    | 5.15     | 0.712   | 730.275 |
|                     | Juveniles    | Mean         | 5.820                 | 4.811                 | 10.631                | 1.21440 | 0.53959 | 0.74570 | 0.67584 | 1.01694 | 0.06986   | -0.27124  | 3.42      | 0.531    | 4.27     | 0.627   | -       |
|                     |              | SD           | 1.761                 | 0.859                 | 2.294                 | 0.32102 | 0.06897 | 0.14000 | 0.08043 | 0.09888 | 0.12141   | 0.05745   | 0.46      | 0.059    | 0.55     | 0.059   | -       |
|                     | Young adults | Mean         | 6.906                 | 6.567                 | 13.473                | 1.06801 | 0.51341 | 0.83607 | 0.81263 | 1.12682 | 0.02344   | -0.29075  | 3.86      | 0.586    | 4.78     | 0.679   | 615.687 |
|                     |              | SD           | 0.980                 | 1.075                 | 1.644                 | 0.18927 | 0.04428 | 0.05939 | 0.07556 | 0.05620 | 0.07716   | 0.03747   | 0.29      | 0.033    | 0.23     | 0.021   | 65.875  |
|                     | Adults       | Mean         | 8.287                 | 6.290                 | 14.577                | 1.32251 | 0.56787 | 0.91733 | 0.79836 | 1.16353 | 0.11897   | -0.24620  | 4.05      | 0.607    | 5.20     | 0.716   | 696.682 |
|                     |              | SD           | 0.810                 | 0.325                 | 0.484                 | 0.19711 | 0.03667 | 0.04250 | 0.02247 | 0.01443 | 0.06497   | 0.02807   | 0.21      | 0.023    | 0.07     | 0.006   | 47.508  |
| <i>Oc. princeps</i> | UAM 35060    | Adult        | 2.423                 | 1.753                 | 4.176                 | 1.38220 | 0.58022 | 0.38435 | 0.24378 | 0.62076 | 0.14057   | -0.23641  | 2.04      | 0.310    | 2.71     | 0.433   | 130.0   |
| <i>Oc. princeps</i> | UAM 35119    | Adult        | 1.756                 | 1.935                 | 3.691                 | 0.90749 | 0.47575 | 0.24452 | 0.28668 | 0.56714 | -0.04216  | -0.32262  | 1.99      | 0.299    | 2.45     | 0.389   | 144.3   |
| <i>Oc. princeps</i> | UAM 113936   | Adult        | 2.076                 | 1.931                 | 4.007                 | 1.07509 | 0.51809 | 0.31723 | 0.28578 | 0.60282 | 0.03145   | -0.28559  | 2.11      | 0.324    | 2.50     | 0.398   | 144.0   |

|                        |                     |             |       |       |         |         |         |          |         |         |          |          |       |       |       |       |         |
|------------------------|---------------------|-------------|-------|-------|---------|---------|---------|----------|---------|---------|----------|----------|-------|-------|-------|-------|---------|
| <i>Oc. collaris</i>    | UAM 2929            | Adult       | 1.665 | 1.823 | 3.488   | 0.91333 | 0.47735 | 0.22141  | 0.26079 | 0.54258 | -0.03937 | -0.32116 | 2.04  | 0.310 | 2.36  | 0.373 | 124.1   |
| <i>Oc. collaris</i>    | UAM 2947            | Adult       | 2.055 | 1.665 | 3.720   | 1.23423 | 0.55242 | 0.31281  | 0.22141 | 0.57054 | 0.09140  | -0.25773 | 2.03  | 0.307 | 2.33  | 0.367 | 126.9   |
| <i>Oc. collaris</i>    | UAM 58315           | Young adult | 0.887 | 1.817 | 2.704   | 0.48817 | 0.32803 | -0.05208 | 0.25935 | 0.43201 | -0.31143 | -0.48408 | 1.79  | 0.253 | 1.88  | 0.274 | 67.0    |
| <i>Oc. collaris</i>    | UAM 63937           | Adult       | 1.824 | 1.474 | 3.298   | 1.23745 | 0.55306 | 0.26102  | 0.16850 | 0.51825 | 0.09253  | -0.25723 | 2.07  | 0.316 | 2.52  | 0.401 | 122.3   |
| <i>Oc. collaris</i>    | UAM 63933           | Adult       | 1.962 | 1.587 | 3.549   | 1.23629 | 0.55283 | 0.29270  | 0.20058 | 0.55011 | 0.09212  | -0.25741 | 2.06  | 0.314 | 2.34  | 0.369 | 121.2   |
| <i>Oc. daurica</i>     | MSB 215075          | Young adult | 1.338 | 1.706 | 3.044   | 0.78429 | 0.43955 | 0.12646  | 0.23198 | 0.48344 | -0.10552 | -0.35699 | 1.82  | 0.260 | 1.96  | 0.292 | 81.0    |
| <i>Oc. daurica</i>     | MSB 215674          | Juvenile    | 0.931 | 2.005 | 2.936   | 0.46434 | 0.31710 | -0.03105 | 0.30211 | 0.46776 | -0.33316 | -0.49881 | 1.83  | 0.262 | 2.01  | 0.303 | 48.0    |
| <i>Oc. daurica</i>     | MSB 215680          | Young adult | 2.426 | 1.784 | 4.210   | 1.35987 | 0.57625 | 0.38489  | 0.25139 | 0.62428 | 0.13350  | -0.23939 | 2.26  | 0.354 | 2.64  | 0.422 | 139.0   |
| <i>Oc. daurica</i>     | MSB 215940          | Juvenile    | 0.542 | 1.413 | 1.955   | 0.38358 | 0.27724 | -0.26600 | 0.15014 | 0.29115 | -0.41614 | -0.55715 | 1.41  | 0.149 | 1.58  | 0.199 | 25.0    |
| <i>Oc. daurica</i>     | MSB 215953          | Adult       | 1.972 | 2.128 | 4.100   | 0.92669 | 0.48098 | 0.29491  | 0.32797 | 0.61278 | -0.03306 | -0.31788 | 1.98  | 0.297 | 2.68  | 0.428 | 141.0   |
| <i>Adults</i>          | <i>Oc. princeps</i> | Mean        | 2.085 | 1.873 | 3.958   | 1.122   | 0.525   | 0.315    | 0.272   | 0.597   | 0.043    | -0.282   | 2.047 | 0.311 | 2.553 | 0.407 | 139.420 |
|                        |                     | SD          | 0.334 | 0.104 | 0.246   | 0.241   | 0.053   | 0.070    | 0.025   | 0.027   | 0.092    | 0.043    | 0.060 | 0.013 | 0.138 | 0.023 | 8.159   |
|                        | <i>Oc. collaris</i> | Mean        | 1.877 | 1.637 | 3.514   | 1.155   | 0.534   | 0.272    | 0.213   | 0.545   | 0.059    | -0.273   | 2.050 | 0.312 | 2.388 | 0.378 | 123.625 |
|                        |                     | SD          | 0.170 | 0.147 | 0.174   | 0.161   | 0.038   | 0.040    | 0.039   | 0.022   | 0.066    | 0.032    | 0.018 | 0.004 | 0.089 | 0.016 | 2.489   |
|                        | <i>Oc. daurica</i>  | Mean        | 1.972 | 2.128 | 4.100   | 0.927   | 0.481   | 0.295    | 0.328   | 0.613   | -0.033   | -0.318   | 1.980 | 0.297 | 2.680 | 0.428 | 141.000 |
|                        |                     | SD          | -     | -     | -       | -       | -       | -        | -       | -       | -        | -        | -     | -     | -     | -     | -       |
| <b>Adults Ochotona</b> | Mean                | 1.967       | 1.787 | 3.754 | 1.11410 | 0.52384 | 0.29112 | 0.24944  | 0.57312 | 0.04168 | -0.28200 | 2.04     | 0.310 | 2.49  | 0.395 | 131.7 |         |
|                        | SD                  | 0.234       | 0.212 | 0.313 | 0.18365 | 0.04146 | 0.05042 | 0.05177  | 0.03633 | 0.07238 | 0.03458  | 0.04     | 0.009 | 0.15  | 0.025 | 9.8   |         |
